# Supplementary material for: Mild Electrical Stimulation and Heat Shock Ameliorates Progressive Proteinuria and Renal Inflammation in Mouse Model of Alport Syndrome
Source: PLOS journal article supplement (doi:10.1371/journal.pone.0043852), 2012-08-24
Supplement: S4 (10.1371/journal.pone.0043852.s004) [file journal.pone.0043852.s004]

**Figure S4.**

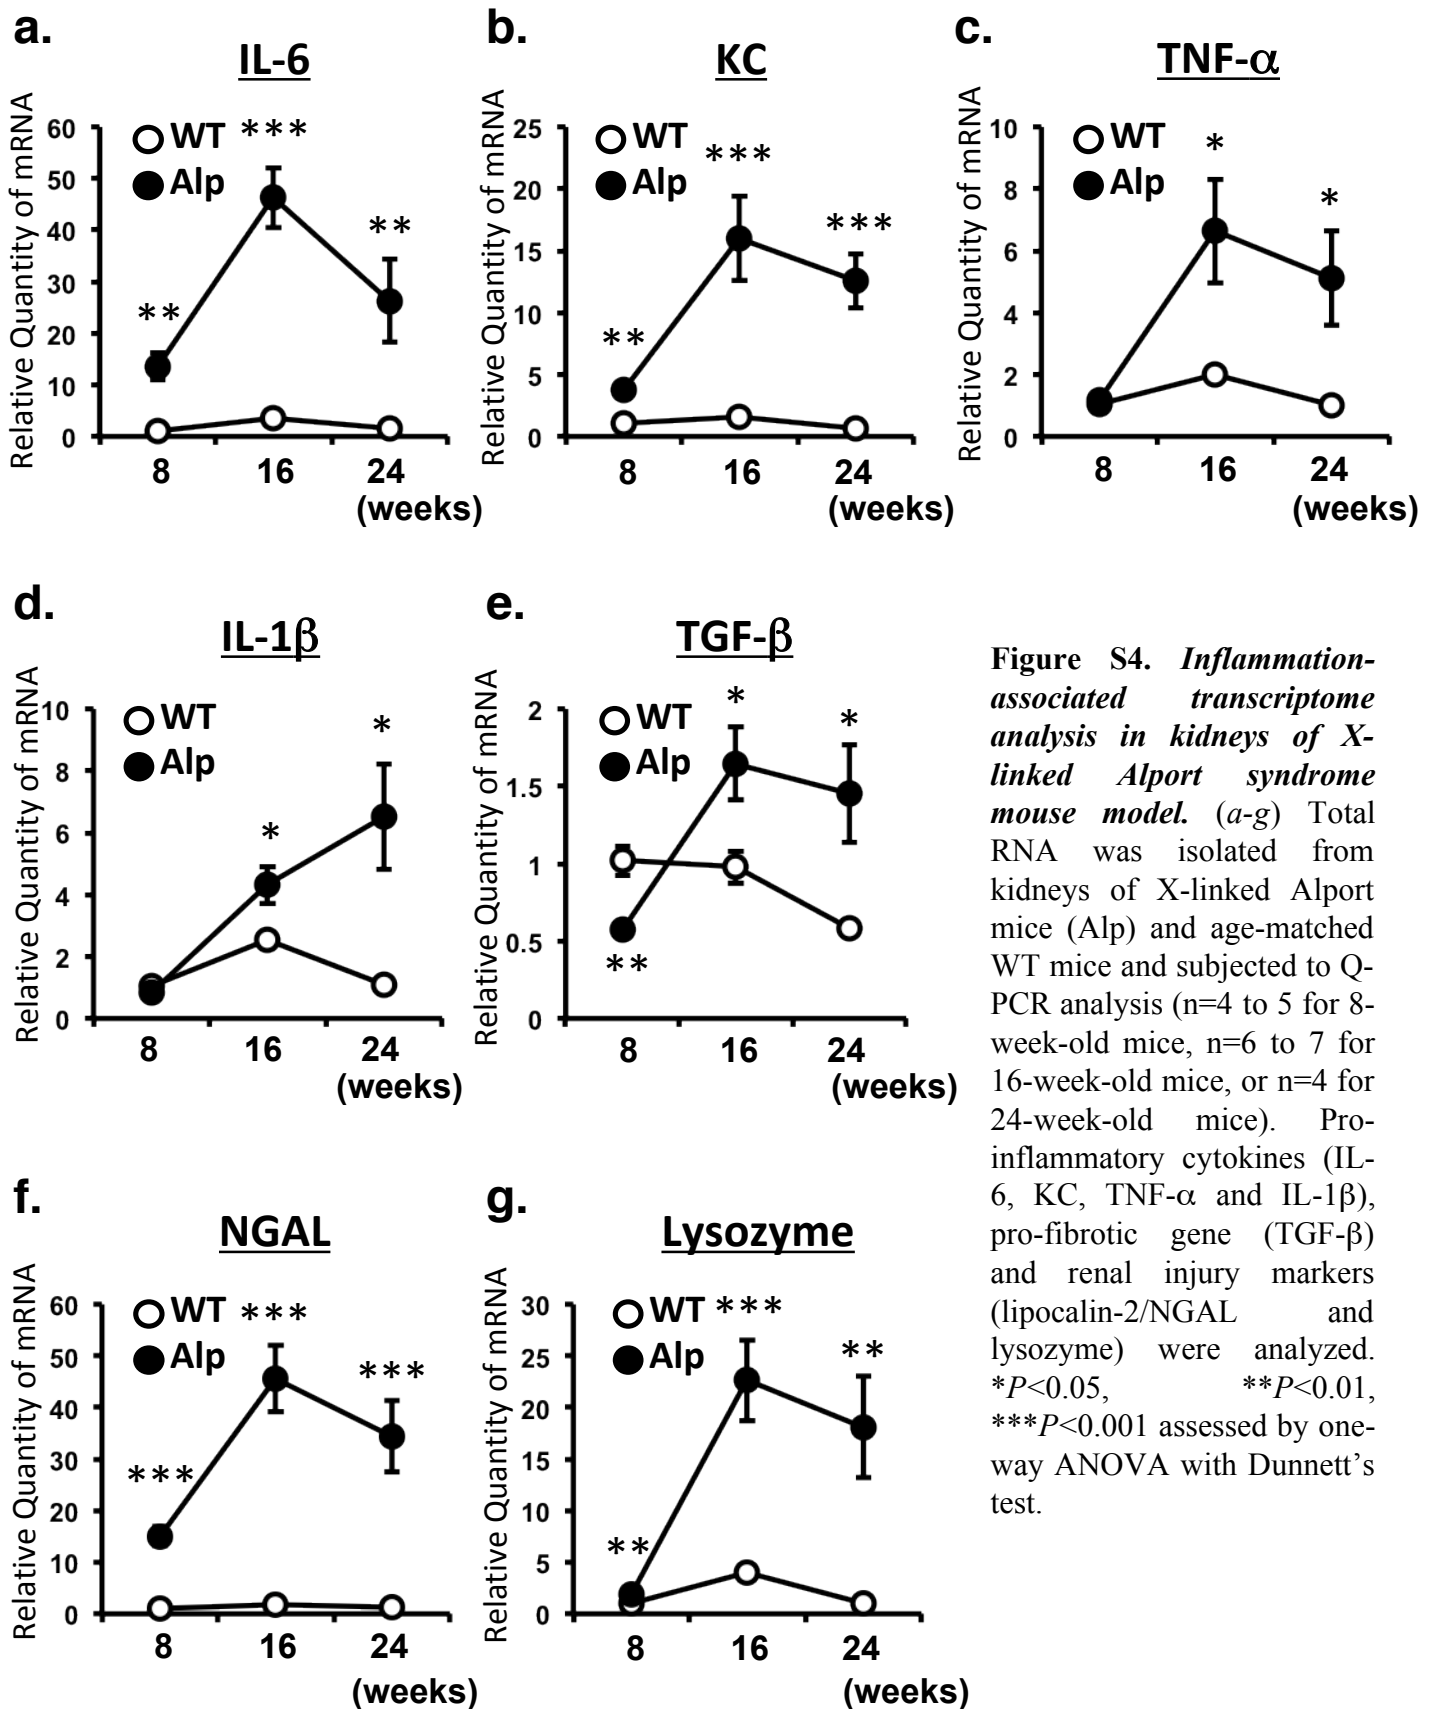

**Figure S4. Inflammation-associated transcriptome analysis in kidneys of X-linked Alport syndrome mouse model.** (a-g) Total RNA was isolated from kidneys of X-linked Alport mice (Alp) and age-matched WT mice and subjected to Q-PCR analysis (n=4 to 5 for 8-week-old mice, n=6 to 7 for 16-week-old mice, or n=4 for 24-week-old mice). Pro-inflammatory cytokines (IL-6, KC, TNF-α and IL-1β), pro-fibrotic gene (TGF-β) and renal injury markers (lipocalin-2/NGAL and lysozyme) were analyzed. \* $P < 0.05$ , \*\* $P < 0.01$ , \*\*\* $P < 0.001$  assessed by one-way ANOVA with Dunnett's test.
