# Supplementary material for: Mild Electrical Stimulation and Heat Shock Ameliorates Progressive Proteinuria and Renal Inflammation in Mouse Model of Alport Syndrome
Source: PLOS journal article supplement (doi:10.1371/journal.pone.0043852), 2012-08-24
Supplement: S5 (10.1371/journal.pone.0043852.s005) [file journal.pone.0043852.s005]

**Figure S5.**

**a.**

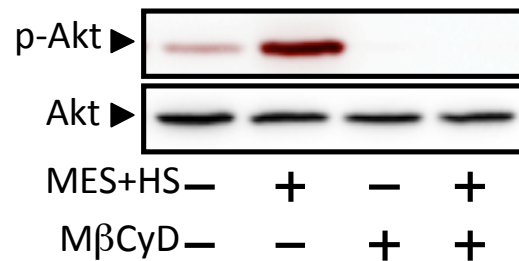

**b.**

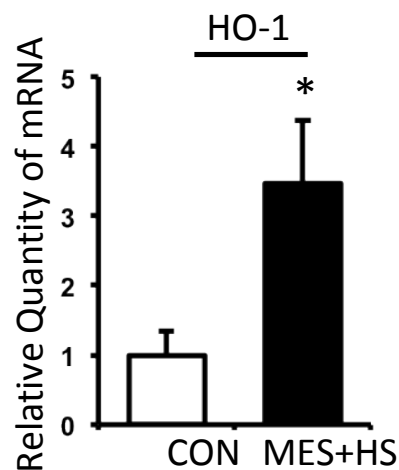

**Figure S5. *MES+HS* activates *Akt* through membrane cholesterol in podocyte *in vitro* and induces *HO-1* mRNA expression in Alport glomeruli *ex vivo*.** (a) Podocytes were treated with MES+HS for 10 minutes with or without 5 mM methyl  $\beta$  cyclodextrin (M $\beta$ CyD). Total cell lysates were analyzed by immunoblotting to check the phospho-Akt or total Akt protein expression. (b) Isolated Alport glomeruli were treated with MES+HS for 10 minutes and total RNA was extracted 5 hr after the treatment. Total RNA was subjected to Q-PCR analysis to check the mRNA expression of HO-1 (n=3). \* $P < 0.05$  as assessed by unpaired *t*-test.
