# Supplementary material for: Mild Electrical Stimulation and Heat Shock Ameliorates Progressive Proteinuria and Renal Inflammation in Mouse Model of Alport Syndrome
Source: PLOS journal article supplement (doi:10.1371/journal.pone.0043852), 2012-08-24
Supplement: S6 (10.1371/journal.pone.0043852.s006) [file journal.pone.0043852.s006]

**Figure S6.**

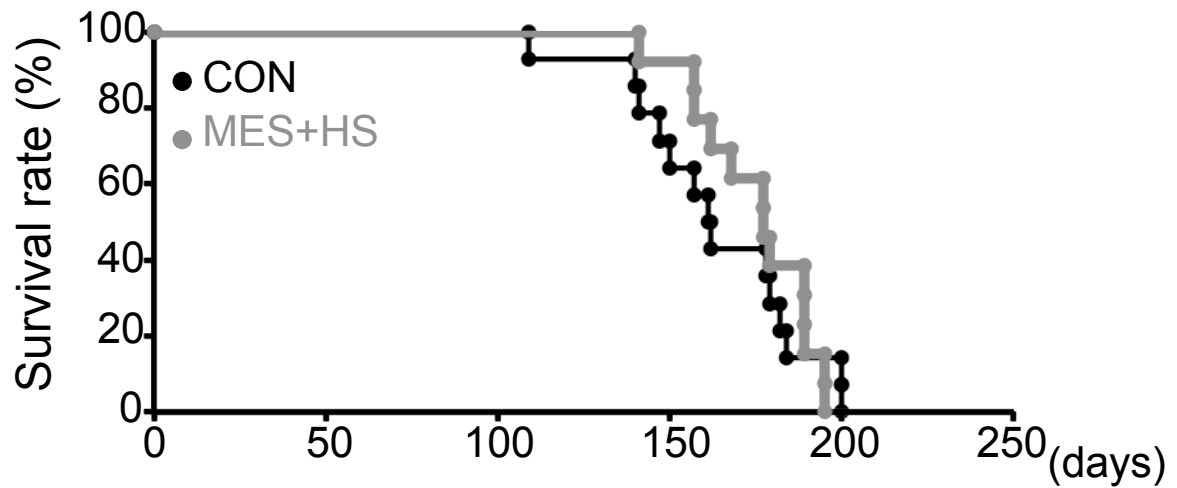

**Figure S6. *MES+HS does not affect the survival of Alport mice.*** Six- to seven-week-old Alport mice were treated with MES+HS for 10 min twice a week. Survival rate is illustrated as Kaplan-Meier curve (n=14 for each group). Black circle: sham-treated group (CON), grey circle: MES+HS-treated group (MES+HS).
